# Supplementary material
Source: Springer Nature journal article supplement (https://www.springermedizin.de/resource/supplementary/12880_2006_37_MOESM4_ESM.pdf/9450418)

**A**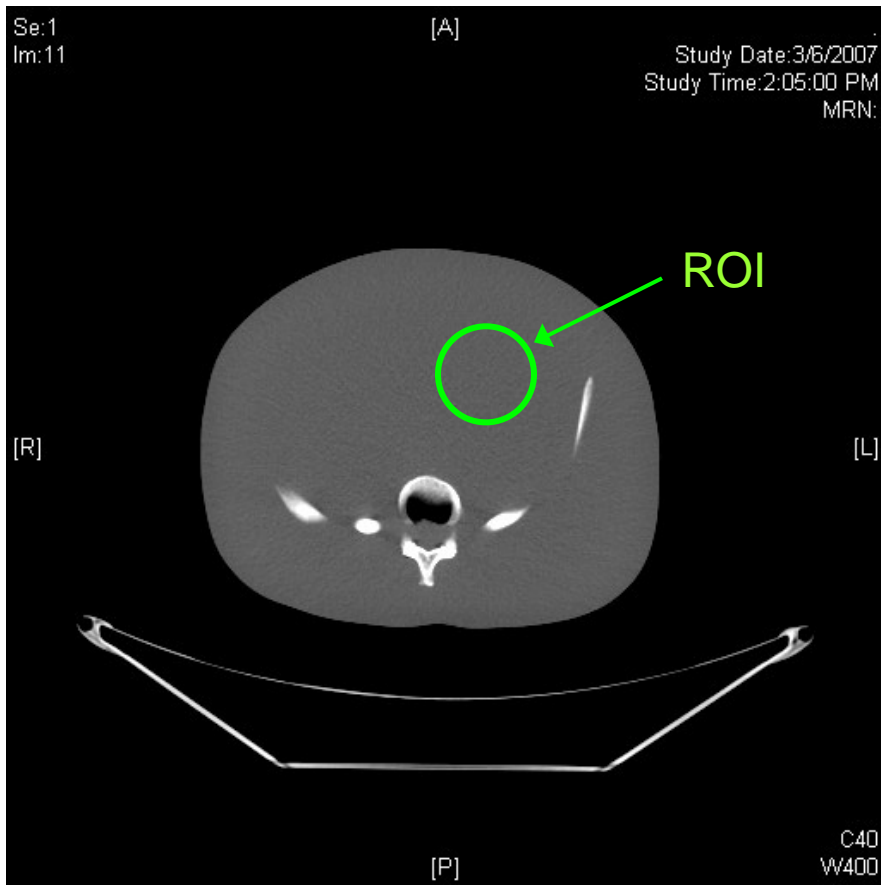**B**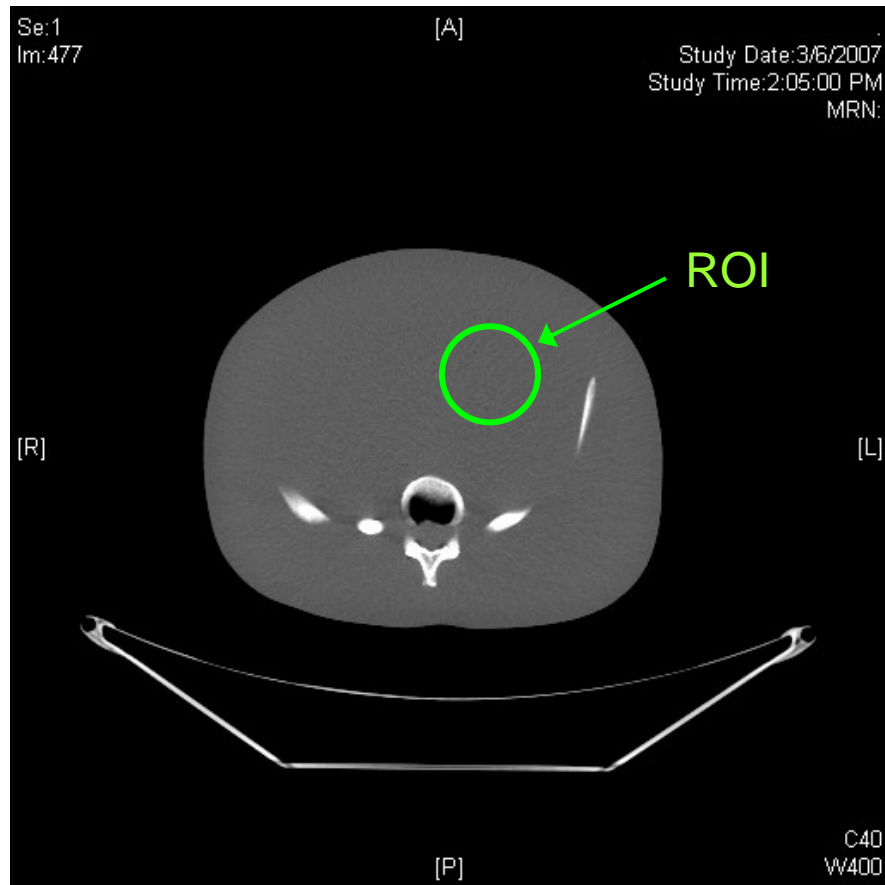

Supplement: MOESM4 [file 9450418]
